# Supplementary material
Source: Springer Nature journal article supplement (https://www.springermedizin.de/resource/supplementary/13037_2012_150_MOESM2_ESM.pdf/9659498)

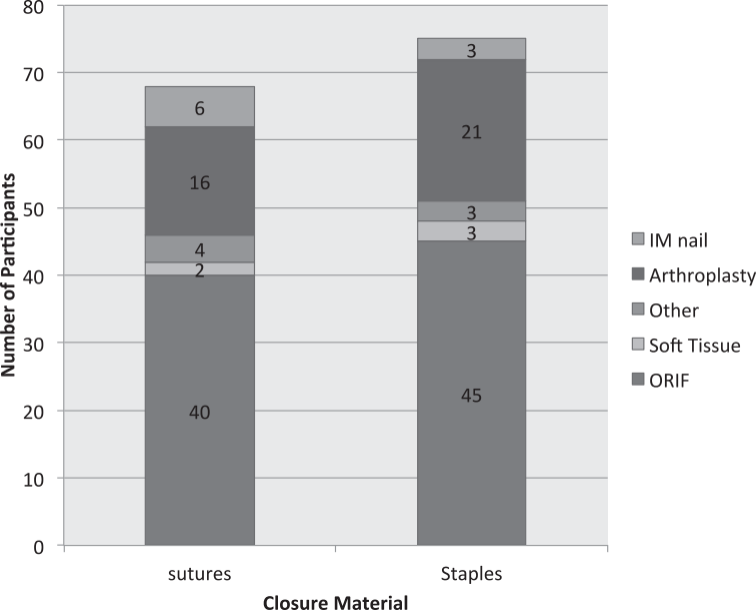

Supplement: MOESM2 [file 9659498]
